*Running title: Evolution of reproductive effort*

32 **Abstract**

33 Life-history theory predicts that the optimal reproductive effort of an organism is affected by  
34 factors such as energy acquisition and predation risk. Although this is a major focus of study in  
35 evolutionary ecology, the empirical evidence consists of conflicting data on a few organisms. For  
36 instance, theoretical models within the foraging mode paradigm suggest that widely foraging  
37 females have evolved low reproductive effort, because a heavy reproductive load decreases their  
38 ability to escape from predators. By contrast, a long-standing prediction of evolutionary theory  
39 indicates that organisms subject to high mortality due to predation, as suggested for widely  
40 foraging species, should increase their reproductive investment. Here, we revise the available  
41 literature on the relationship between foraging mode and reproductive effort of lizards. In doing  
42 so, we present evidence that widely foraging species have evolved greater reproductive effort  
43 than sit-and wait species. This is the largest comparative analysis of foraging mode and  
44 reproductive effort to date: 485 species grouped in 32 families. Based on our findings, we  
45 propose a theoretical model derived from the optimal foraging theory that potentially explains the  
46 observed patterns in lizards, paving the way for ecologist to test mechanistic hypotheses at the  
47 intraspecific level.

48

*Running title: Evolution of reproductive effort*

49 **Main Text**

50 **Introduction**

51

52 The foraging behaviors of vertebrates lie along a continuum, ranging from the energetically  
53 demanding strategy of foraging actively to the energetically conservative strategy of sit-and-wait  
54 foraging (Pianka 1966; Perry 1999). Over the past 50 years, ecologists have developed a set of  
55 hypotheses about how an organism's foraging mode relates to its life history (Vitt & Congdon  
56 1978; Vitt & Price 1982; Dunham *et al.* 1988; Webb *et al.* 2003). These relationships stem from  
57 two major assumptions (Fig. 1). First, widely foraging animals spend more energy to forage than  
58 a sit-and-wait foragers, but might also consume enough food to have more surplus energy  
59 (Anderson & Karasov 1981, 1988; Huey & Pianka 1981; Nagy *et al.* 1984; Stuginski *et al.* 2018;  
60 Bury 2021). However, sit-and-wait foragers might exhibit wider diet breadths, because they  
61 encounter prey less frequently compared to active foragers (Glaudas *et al.* 2019). Second, a  
62 widely foraging animal could suffer a greater risk of mortality because its movements are  
63 conspicuous to predators (Cooper & Perez-Mellado 2004). Both a greater energy supply and a  
64 greater mortality risk would select for genotypes that allocate more energy to reproduction,  
65 manifested as more or larger offspring (Bonnet *et al.* 2001; Silva *et al.* 2020). The evolution of  
66 greater reproductive effort could feed back on the energy gain and mortality risk if a female  
67 carrying a greater mass of offspring tends to chase prey (Shine 1980). Similarly, the load  
68 associated with food consumption may compromise the locomotion of individuals, increasing the  
69 vulnerability to predators (Werner & Anholt 1993; Cooper 2000). In this model, a suite of traits  
70 associated with foraging mode would coadapt to the spatiotemporal distributions of prey and  
71 predators.

72

73 Despite the wealth of conjecture, these hypothetical relationships among foraging mode  
74 and other traits have been assessed in only a handful of cases, as described above. Ideally, one  
75 would isolate each relationship and conduct experiments to quantify the evolution of traits in

*Running title: Evolution of reproductive effort*

76 controlled environments (Huey & Bennet 1986). However, such data are difficult to gather for  
77 many species and will probably remain rare. For instance, limited circumstantial evidence exists  
78 for the putative relationship between foraging mode and predation risk. Data on stomach contents  
79 of field-collected vipers suggested that widely foraging lacertids are more vulnerable to predators  
80 than sedentary species (Huey & Pianka 1981), but a number of confounding factors can explain  
81 this observation as well as foraging mode can. Alternatively, researchers have evaluated the  
82 relationship between mortality and life-history traits with no emphasis on foraging behavior. For  
83 example, experimental evolution with guppies and fruit flies revealed that genotypes that evolved  
84 in risky environments developed more rapidly, matured at a smaller size, and reached their peak  
85 of fecundity faster than did genotypes that evolved in safe environments (Stearns 2000; Reznick  
86 *et al.* 2001). From these results, we expect that a high rate of predation selects for greater  
87 reproductive effort, but given the scarce evidence, it is still uncertain whether foraging mode  
88 generally affects predation risk or net energy gain.

89

90         Although experimental data are lacking, comparative methods have been used to explore  
91 how foraging mode and life-history traits have evolved. These interspecific analyses have  
92 focused mostly on the reproductive effort of lizards. The earliest analysis of 22 species revealed  
93 an unexpected pattern: sit-and-wait species had a greater reproductive effort than widely foraging  
94 species (Vitt & Congdon 1978). The authors suggested that widely foraging species might be  
95 forced to carry fewer or smaller offspring, because moving long distances with a voluminous  
96 clutch decreases the chance of escaping from a predator. A subsequent analysis of data for 50  
97 species of lizards supports this result by testing a model in which predation risk increased with  
98 increasing reproductive effort (Vitt & Price 1982). Consecutively, Roff (2002) extended support for  
99 this model in a comparative analysis of 130 lizard species. However, none of these early  
100 analyses controlled for potential phylogenetic correlations that might generate spurious  
101 relationships between foraging mode and reproductive effort (Felsenstein 1985), especially  
102 because foraging could vary greatly among but little within families. A more recent analysis, using

*Running title: Evolution of reproductive effort*

103 phylogenetic comparative methods, failed to detect a significant relationship between foraging  
104 mode and reproductive effort (Mesquita *et al.* 2016). Thus, despite several attempts to establish a  
105 relationship between foraging mode and the life history, we still lack support for a long-standing  
106 prediction of the foraging-mode paradigm.

107

108 Here, we present the first evidence that widely foraging species have evolved greater  
109 reproductive effort than sit-and wait species. This evidence comes from the largest comparative  
110 analysis of foraging mode and reproductive effort to date: 485 species of lizards representing 32  
111 families. In this analysis, we inferred the evolutionary history of foraging modes, complementing  
112 on past reconstructions of ancestral states (Miles *et al.* 2007). In contrast to previous analyses,  
113 our study supports the prediction of theoretical models of the optimal reproductive effort, paving  
114 the way for ecologists to test mechanistic hypotheses at the intraspecific level.

115

## 116 **Materials and Methods**

117

### 118 ***Data source and description of variables***

119 We used published estimates of life history and foraging behavior for 485 species of lizards  
120 grouped in 32 families, excluding amphisbaenians and snakes. These data represent a subset of  
121 a data assembled from primary and secondary literature on lizards' traits published during the last  
122 12 years (Meiri 2018). The reproductive effort of the species was defined as the product of the  
123 mean snout-vent length of hatchlings or neonates (mm) and the mean clutch or litter size. Given  
124 the limited data available for clutch frequency in widely foraging and sit-and-wait species, we  
125 could not examine the lifetime reproductive effort of lizards. Instead, our measure represents the  
126 investment of females in a single reproductive event. Our measure of maternal size consisted of  
127 the mean snout-vent length of adult females. We used the length of hatchlings rather than the  
128 mass of eggs, because the latter might reflect high water content rather than energy content in

*Running title: Evolution of reproductive effort*

129 lizards that lay poorly calcified eggs (Deeming 2004; Meiri *et al.* 2015). Moreover, hatchling size  
130 can be measured for viviparous species as well as oviparous species.

131

132           Although relative clutch mass is commonly reported as an index of reproductive effort, we  
133 used a different index to avoid statistical issues associated with analyzing a ratio. Ratios of  
134 random numbers regressed against their denominator will automatically yield negative  
135 correlations (Atchley *et al.* 1876; Packard & Boardman 1988). For example, a comparative study  
136 of 551 species of lizards revealed a negative effect of maternal size on relative clutch mass (Meiri  
137 *et al.* 2012). This result is difficult to interpret as it contrasts with most theoretical models, which  
138 predict that relative clutch mass should increase with maternal size (Roff 2002)—a pattern  
139 observed in many organisms (e.g., Primack 1979; Barneche *et al.* 2018; Marshall *et al.* 2021).

140

141           We defined the foraging mode of a species based on whether it has been reported as an  
142 ambush predator (“sit-and-wait”), an active forager (“widely foraging”), or uses a mixed strategy  
143 (“mixed”). Although this categorization seems somewhat artificial and simplistic, numerous  
144 species of lizards clearly belong to one of these categories (Huey & Pianka 1981; Perry 1999).  
145 We focused our analyses only on carnivores, because herbivores do not fit into the classical  
146 paradigm of foraging modes (Pianka & Vitt 2003).

147

148 ***Ancestral character and phylogenetic signal estimates***

149 To determine the appropriate model of evolution, we used a set of continuous-time discrete-state  
150 Markov chain models to sample the character histories from their posterior probability distribution  
151 (Huelsenbeck *et al.* 2003), and a time-calibrated phylogeny of squamate reptiles (Zheng & Wiens  
152 2016). We rooted the tree with the Tuatara (*Sphenodon punctatus*) as the outgroup for our study  
153 taxa. Based on previous analyses, we coded this outgroup as a sit-and-wait forager (Pianka & Vitt  
154 2003; Vitt *et al.* 2003). We fitted three different models to our data, using the function  
155 *make.simmap* from the R package “phytools” version 0.7.80 (Revell 2012; R Core Team 2021).

*Running title: Evolution of reproductive effort*

156 These models were as follows: 1) an equal rates model (ER), in which the rate of change  
157 between all three states of the character are assumed to be equivalent; 2) an all-rates-different  
158 model (ARD), which allows the transitions among states to have different rates; 3) and a  
159 symmetrical model (SYM), which allows different rates of change between pairs of states but  
160 changes between all states are theoretically possible. For each model, we estimated the  
161 stationary distribution by numerical solving for  $\rho_i$  ( $\rho_i = \text{'estimated'}$ ), and this was used as prior  
162 distribution on the root node of the tree. These models sample the character histories conditioned  
163 on the transition matrix ( $Q$  matrix) and use the phylogenetic tree with annotated tips to create  
164 stochastic simulation maps for the potential evolutionary transitions between foraging modes. To  
165 describe the variation in reproductive effort across the study taxa, we plotted bars adjacent to the  
166 tips of the phylogeny representing values of species reproductive effort. We selected the most  
167 likely model of evolution based on the Akaike Information Criterion (AIC). Lastly, we generated  
168 10000 trees of the most-likely model and used the *summary* function to count the total number of  
169 transitions that occurred between character states (see supporting material for detailed  
170 information).

171

172 We computed our measure of phylogenetic signal (or character dispersion on a  
173 phylogeny) by using the Fritz and Purvis' *D test*, available through the function *phylo.d* in the R  
174 package "caper" version 1.0.1 (Fritz & Purvis 2010; Orme *et al.* 2018; R Core Team 2021). This  
175 parameter is calculated as follows:

176

177 
$$D = \frac{[\sum d_{obs} - \text{mean}(\sum d_b)]}{[\text{mean}(\sum d_r) - \text{mean}(\sum d_b)]}$$

178

179 where  $d_{obs}$  equals the number of character-state changes required to get the observed  
180 distribution of character states at the tips of the phylogeny. The  $d_{obs}$  is then scaled using two null  
181 distributions. The first distribution,  $d_r$ , comprises  $d$  values obtained from permutations where the

*Running title: Evolution of reproductive effort*

182 number of species with each character state is kept constant, but the values are shuffled on the  
183 tips of the phylogeny. Thus,  $d_r$  is the expected distribution of  $d$  values if character states are  
184 randomly distributed among species without respect to phylogeny. The second distribution,  $d_b$ ,  
185 comprises the  $d$  values expected if character states are distributed among species under the  
186 expectations of the Brownian motion model of evolution. We generated  $d_b$  by simulating a  
187 continuous trait along the phylogeny, then defining the character state at each tip according to  
188 some threshold value of the continuous trait (Fritz & Purvis 2010). The value of  $D$  equals 1 if the  
189 distribution of the binary trait is random with respect to phylogeny, and exceeds 1 if the  
190 distribution of the trait is more overdispersed than the random expectation. The value of  $D$  equals  
191 0 if the binary trait is distributed as expected under the Brownian motion model of evolution, and  
192 is less than 0 if the binary trait is more phylogenetically conserved than the Brownian expectation.  
193 The distributions  $d_r$  and  $d_b$  were used to assign  $p$  – values to  $d_{obs}$ . Accordingly, if  $d_{obs}$  is larger  
194 than 95% of  $d_r$  values, the distribution of the trait would be significantly more overdispersed than  
195 the random expectation, if  $d_{obs}$  is less than 95% of  $d_b$  values, the character would be significantly  
196 more clumped than the Brownian expectation.

197

198 ***Effects of body length and foraging mode on reproductive effort***

199 We fitted Phylogenetic Generalized Least Squares models (PGLS) to test our prediction on the  
200 relationship among body length, foraging mode, and the reproductive effort of lizards. In  
201 comparative biology, normal regression models cannot be used because the assumption of  
202 independence of residuals is violated (Felsenstein 1985; Harvey & Pagel 1991). This problem can  
203 be corrected using phylogenetic comparative methods. We fitted the models using the function  
204 *gls* from the R package “nlme” version 3.1-152 (Pinheiro *et al.* 2021; R Core Team 2021). We  
205 adopted the reproductive effort of lizards as our response variable. Similarly, maternal length and  
206 foraging mode corresponded to our predictor variables. We fitted the models assuming two ways  
207 in which the tree structure was expected to affect the covariance in trait values across taxa  
208 (corBrownian and corPagel —value = 0— error structures, using the R package “ape”). We



*Running title: Evolution of reproductive effort*

209 selected the best-fit model based on the AIC values (see supporting material for detailed  
210 information). To avoid confounding results due to a potential large variation in maternal length  
211 among species, we not only tested our prediction for all lizards in our data set (Fig. 3A), but also  
212 examined the data at lower taxonomic scales (e.g., within the superfamily Scincoidea; Fig. 3B).  
213 Analyzing the data at different taxonomic scales enabled us to better investigate the level of  
214 support for the prediction tested.

215

## 216 **Results**

217

218 The evolutionary transitions in foraging modes among lizards were best described by a model in  
219 which rates of evolution differ among modes, referred to as the all-rates-different model. Despite  
220 a slightly difference with the widely foraging state, our analysis revealed that sit-and-wait foraging  
221 is the most likely ancestral state of all lacertilians (Fig. 2). Sit-and-wait foraging has evolved in two  
222 major clades of lizards; near the root of the tree, we found strong evidence suggesting that the  
223 ancestor of Gekkota was a sit-and-wait predator. Likewise, the ancestor of iguanians was a sit-  
224 and-wait predator. Iguanians included in our analysis are part of both the Acrodonta and  
225 Pleurodonta clades. During the early Jurassic ( $\approx 200$  mya), a major transition from sit-and-wait to  
226 widely foraging occurred in the ancestor of Anguimorpha, Lacertoidea, and Scincoidea. Since  
227 then, a reverse transition from widely foraging to sit-and-wait foraging occurred within Scincoidea,  
228 in the ancestor of spiny-tailed lizards and night lizards (Cordylidae and Xantusiidae). The  
229 estimate of the  $D$  test for phylogenetic signal indicated that foraging mode is phylogenetically  
230 conserved as expected under a Brownian motion model of evolution ( $D = -0.14$ ,  $p[D < 1] = 0$ ,  
231  $p[D > 0] = 0.80$ ).

232

233 Our analyses show that widely foraging species have evolved greater reproductive effort  
234 than sit-and-wait species. However, the mechanism underlying this pattern is mediated by a  
235 complex interaction between foraging mode and maternal length (Table 1). In Lacertilia, widely

*Running title: Evolution of reproductive effort*

236 foraging species have greater reproductive effort for two reasons: 1) they are larger in size, and  
237 2) on average, they give birth to a higher number of offspring for a given size (Fig. 3A). In the  
238 superfamily Scincoidea, widely foraging species evolved greater reproductive effort despite  
239 having a smaller mean body length (Fig. 3B). Interestingly, skinks that adopt a mixed foraging  
240 behavior have also evolved greater reproductive effort than sit-and-wait skinks.

241

## 242 **Discussion**

243

244 Our results show that widely foraging species have evolved a greater reproductive effort than sit-  
245 and-wait species. Presumably, the ability of widely foraging lizards to harvest and assimilate more  
246 resources might explain this pattern. Studies on field metabolic rate of free-ranging lizards  
247 suggest that an average widely foraging species spends 32% more daily energy than a sit-and-  
248 wait lizard, but this extra energy expenditure is probably paid off with greater daily food  
249 consumption (Brown & Nagy 2007). Food consumption may play an important role in determining  
250 the reproductive effort of lizards in three ways: 1) it promotes follicular growth during the  
251 reproductive season; 2) in the long term, it increases energy stores to initiate reproduction (e.g.,  
252 vitellogenesis). and 3) it may also reduce age at first reproduction. Consistent with these ideas,  
253 Bonnet and colleagues found that female vipers that had good body condition early in  
254 vitellogenesis produced large litters (Bonnet *et al.* 2001). Similarly, vipers that gained more mass  
255 during follicular growth produced larger offspring. Early reproduction gives offspring sufficient time  
256 to mature in the same year that they hatched, which enables them to participate as adults in the  
257 subsequent breeding season (Hahn & Tinkle 1965). Therefore, the foraging behavior of a widely  
258 foraging female can increase the amount of gametic resources gathered before and during each  
259 reproductive bout, potentially resulting in more energy to invest in reproduction.

260

261         Additionally, maternal size also plays an important role in determining the reproductive  
262 effort of lizards. Among many ectotherms and plants, a common pattern is that reproductive effort

*Running title: Evolution of reproductive effort*

263 increases with size (Tinkle 1967; Primack 1979; Bownds *et al.* 2010; Barneche *et al.* 2018;  
264 Marshall *et al.* 2018, 2021). This observation indicates that increased size might evolve by natural  
265 selection, because it increases the fitness of individuals. Interestingly, our results paint a more  
266 complex picture of the effect of body size on reproductive effort. We found that the relationship  
267 between maternal length and reproductive effort depends on foraging mode. The most complex  
268 form of relationship occurs when small widely-foraging females have a greater reproductive effort  
269 than large sit-and-wait females (Fig. 3B). A model of the evolution of optimal reproductive effort  
270 predicts this pattern (Parker & Begon 1986). This model suggests that the total energy  
271 accumulated for reproduction ( $m$ ) depends on the time spent foraging ( $t$ ) and maternal size.  
272 Assuming that females have the same foraging efficiency, smaller females would reach their  
273 maximum capacity to accumulate resources at lower values of  $m$ , producing fewer or smaller  
274 offspring than larger females (Fig. 4A). However, if a widely foraging female has a smaller body  
275 size but a higher foraging efficiency, she may have greater reproductive investment than a large  
276 sit-and-wait female (Fig. 4B). The same outcome should be observed if a widely foraging female  
277 is both a larger and more efficient forager than a sit-and-wait female (Fig. 4C). Furthermore, if  
278 widely foraging females are more efficient at foraging, they may have both a shorter foraging time  
279 and a reduced interclutch interval. Therefore, widely foraging females might not only produce  
280 larger or more offspring in a single clutch, but they might also increase the number of clutches  
281 throughout their lifetime.

282

283         Because the risk of predation presumably depends on the time spent foraging, individuals  
284 that require less time to accumulate the optimal amount of resources should incur a lower  
285 probability of death. Based on the theory of foraging by Schoener, the energy accumulated from  
286 foraging increases monotonically toward an asymptote (Schoener 1971). In such cases, the law  
287 of diminishing returns implies that foraging for twice as long would not result in twice the energetic  
288 return (Fig. 4B). Therefore, greater foraging efficiency (more energy gain per foraging time)  
289 should enable an organism to survive better in environments with high predation risk. Consistent

*Running title: Evolution of reproductive effort*

290 with this idea, a study on foraging efficiency (defined as ratio of metabolizable energy gained  
291 while foraging to the energy spent while foraging) partially indicates that widely foraging lizards  
292 spent less time foraging but grew larger than did sit-and-wait lizards (Nagy *et al.* 1984). Indeed,  
293 our results show that widely foraging lizards are, on average, larger than sit-and-wait lizards (Fig.  
294 3A). The ability of widely foraging species to rapidly outgrow a sit-and-wait species may also  
295 enable them to outgrow the gape limitations of predators (Lynch 1980; Reznick & Endler 1982).  
296 Furthermore, when competition for mates is crucial, the winner of a mating-contest between two  
297 competitors is generally the larger individual (Roff 2002). Therefore, if body size is critical to  
298 outperform predators and outcompete conspecifics, the optimal pattern may be to grow to the  
299 maximal size that leads to the greatest reproductive effort.

300

301         The foraging mode paradigm is mostly focused on dichotomous variation, yet plastic  
302 variation in foraging mode may drive the evolution of the reproductive effort in some species.  
303 Recent studies have revealed that the foraging mode of an organism depends on the ecological  
304 context, such as presence of predators, abundance of prey, or habitat degradation (Greef &  
305 Whiting 2000; Hawlena & Perez-Mellado 2009; Wasiolka *et al.* 2009; Donihue 2016). Such  
306 plasticity could precede rapid evolutionary change and local adaptation of the life history  
307 (Richardson *et al.* 2014). Our results show a strong presence of species that adopt a mixed  
308 foraging strategy in the superfamilies Anguimorpha, Gekkota, Iguania, and Scincoidea (Fig. 2).  
309 Interestingly, these lizards have greater reproductive effort than do sit-and-wait lizards,  
310 specifically for species of relative small size (Fig. 3B). Because mixed foraging species are often  
311 exposed to a wide range of environments with different selective pressures, these species might  
312 actively select habitats that maximize their reproductive effort, indirectly resulting in local  
313 adaptation (Richardson *et al.* 2014). Our analysis, which provides the first evidence that a mixed  
314 foraging strategy can lead to greater reproductive effort, should encourage others to address the  
315 questions raised by this discovery.

316

*Running title: Evolution of reproductive effort*

317           Our study presents the first evidence that the early shift in foraging mode—from sit-and-  
318 wait to widely foraging—in the evolutionary history of lacertilians was accompanied by the  
319 evolution of a greater reproductive effort in most widely foraging species (Fig. 3). Based on the  
320 theory of optimal foraging, we propose a theoretical model that potentially helps to better  
321 understand the evolution of the optimal life-history strategy. This model is emphasized on a  
322 complex covariation between energy gain, maternal size, and foraging mode. Investigating how  
323 much energy an individual obtains from the environment is crucial in life-history analysis because  
324 the flux of energy within an organism not only determines its survival, but also whether it can  
325 engage in reproduction, a very evolutionarily important activity. Currently, analyses of the  
326 energetics of foraging modes stem from measures of a few species in short periods of a season.  
327 Such data overlook the physiological and ecological constraints of seasonality on some  
328 organisms. For example, widely foraging lizards in the Kalahari Desert consume more food during  
329 the summer, but stop eating during winter as they hibernate. By contrast, sit-and-wait lizards  
330 probably forage during both seasons as they remain active during winter (Huey *et al.* 2021).  
331 Evidence of this nature is still rare in the current literature, revealing the need for long-term  
332 studies on the energetics of foraging modes. Similarly, direct comparisons of mortality rates in  
333 widely foraging versus sit-and-wait species are required, as the existing data prevent us from  
334 making convincing conclusions on the relationship between foraging mode and vulnerability to  
335 predation. Finally, our study captured the effects of foraging plasticity on the evolution of the  
336 reproductive effort of lizards. Overall, lizards that adopt a mixed foraging strategy also have  
337 greater reproductive effort than do sit-and-wait species. This result suggests that foraging  
338 plasticity can result in differential reproductive effort and opens the question for future studies of  
339 whether the foraging efficiency and predation risk of each mode influence the evolution of  
340 fecundity in species that forage plastically.

341

342

343

Running title: Evolution of reproductive effort

344 **Acknowledgments**

345

346 We thank Mark O'Shea for providing us with lizard photos for data visualization. We also thank

347 Gustavo Burin for his valuable comments on an early draft of our manuscript.

348

349 **References**

350

351 Anderson, R. & Karasov, W. (1981). Contrasts in Energy Intake and Expenditure in Sit-and-Wait  
352 and Widely Foraging Lizards. *Oecologia*, 49, 67–72.

353 Anderson, R. & Karasov, W. (1988). Energetics of the Lizard *Cnemidophorus Tigris* and Life  
354 History Consequences of Food- Acquisition Mode. *Ecological Monographs*, 58, 79–110.

355 Atchley, W.R., Gaskins, C.T. & Anderson, D. (1876). Statistical Properties of Ratios . I . Empirical  
356 Results. *Systematic zoology*, 25, 137–148.

357 Barneche, D.R., Robertson, † D Ross, White, C.R. & Marshall, D.J. (2018). Fish reproductive-  
358 energy output increases disproportionately with body size. *Science*, 360, 642–645.

359 Bonnet, X., Naulleau, G., Shine, R. & Lourdaï, O. (2001). Short-term versus long-term effects of  
360 food intake on reproductive output in a viviparous snake, *Vipera aspis*. *Oikos*, 92, 297–308.

361 Bownds, C., Wilson, R. & Marshall, D.J. (2010). Why do colder mothers produce larger eggs? An  
362 optimality approach. *Journal of Experimental Biology*, 213, 3796–3801.

363 Brown, T.K. & Nagy, K.A. (2007). Lizard Ecology. In: *Lizard Ecology* (eds. Reilly, S., McBrayer, L.  
364 & Miles, D.B.). Cambridge University Press, New York, pp. 120–140.

365 Bury, S. (2021). Energy expenses on prey processing are comparable, but paid at a higher  
366 metabolic scope and for a longer time in ambush vs active predators: a multispecies study  
367 on snakes. *Oecologia*, 197, 61–70.

368 Cooper, W.E.Jr. (2000). Tradeoffs between Predation Risk and Feeding in a Lizard, the Broad-  
369 Headed Skink (*Eumeces laticeps*). *Behaviour*, 137, 1175–1189.

370 Cooper, W.E.Jr. & Perez-Mellado, V. (2004). Tradeoffs between Escape Behavior and Foraging  
371 Opportunity by the Balearic Lizard (*Podarcis lilfordi*), 60, 321–324.

372 Deeming, D. (2004). *Reptilian Incubation: Environment, Evolution and Behaviour*. Nottingham  
373 University Press, Nottingham.

374 Donihue, C.M. (2016). Aegean wall lizards switch foraging modes, diet, and morphology in a  
375 human-built environment. *Ecology and Evolution*, 6, 7433–7442.

376 Dunham, A., Miles, D. & Reznick, D. (1988). Life history patterns in squamate reptiles. In: *Biology*  
377 *of the Reptilia* (eds. Gans, C. & Huey, R.B.). A.R. Liss., New York, pp. 441–511.

*Running title: Evolution of reproductive effort*

- 378 Felsenstein, J. (1985). Phylogenies and the Comparative Method. *The American naturalist*, 125,  
379 1–15.
- 380 Fritz, S.A. & Purvis, A. (2010). Selectivity in mammalian extinction risk and threat types: A new  
381 measure of phylogenetic signal strength in binary traits. *Conservation Biology*, 24, 1042–  
382 1051.
- 383 Glaudas, X., Glennon, K.L., Martins, M., Luiselli, L., Fearn, S., Trembath, D.F., *et al.* (2019).  
384 Foraging mode, relative prey size and diet breadth: A phylogenetically explicit analysis of  
385 snake feeding ecology. *Journal of Animal Ecology*, 88, 757–767.
- 386 Greef, J.M. & Whiting, M.J. (2000). Foraging-Mode Plasticity in the Lizard *Platysaurus broadleyi*.  
387 *Herpetologica*, 56, 402–407.
- 388 Hahn, W.E. & Tinkle, D.W. (1965). Fat body cycling and experimental evidence for its adaptive  
389 significance to ovarian follicle development in the lizard *Uta stansburiana*. *Journal of*  
390 *Experimental Zoology*, 158, 79–85.
- 391 Harvey, P. & Pagel, M. (1991). *The Comparative Method in Evolutionary Biology*. Oxford  
392 University Press, United States.
- 393 Hawlena, D. & Perez-Mellado, V. (2009). Change Your Diet or Die: Predator-Induced Shifts in  
394 Insectivorous Lizard Feeding Ecology. *Oecologia*, 161, 411–419.
- 395 Huelsenbeck, J.P., Nielsen, R. & Bollback, J.P. (2003). Stochastic mapping of morphological  
396 characters. *Systematic Biology*, 52, 131–158.
- 397 Huey, R.B. & Pianka, E.R. (1981). Ecological Consequences of Foraging Mode. *Ecology*, 62,  
398 991–999.
- 399 Huey, R.B. & Bennet, A.F. (1986). A comparative approach to field and laboratory studies in  
400 evolutionary ecology. In: *Predator-prey relationships in lower vertebrates* (eds. Feder, M.E.  
401 & Lauder, G. v.). University of Chicago, Chicago, IL, pp. 82–89.
- 402 Huey, R.B., Miles, D.B. & Pianka, E.R. (2021). Seasonality in kgalagadi lizards: Inferences from  
403 legacy data. *American Naturalist*, 198, 759–771.
- 404 Lynch, M. (1980). The Evolution of Cladoceran Life Histories. *The Quarterly Review of Biology*,  
405 55, 23–42.
- 406 Marshall, D.J., Barneche, D.R. & White, C.R. (2021). How does spawning frequency scale with  
407 body size in marine fishes? *Fish and Fisheries*, 1–8.
- 408 Marshall, D.J., Pettersen, A.K. & Cameron, H. (2018). A global synthesis of offspring size  
409 variation, its eco-evolutionary causes and consequences. *Functional Ecology*, 32, 1436–  
410 1446.
- 411 Meiri, S. (2018). Traits of lizards of the world: Variation around a successful evolutionary design.  
412 *Global Ecology and Biogeography*, 27, 1168–1172.
- 413 Meiri, S., Brown, J.H. & Sibly, R.M. (2012). The ecology of lizard reproductive output. *Global*  
414 *Ecology and Biogeography*, 21, 592–602.
- 415 Meiri, S., Feldman, A. & Kratochvíl, L. (2015). Squamate hatchling size and the evolutionary  
416 causes of negative offspring size allometry. *Journal of Evolutionary Biology*, 28, 438–446.



*Running title: Evolution of reproductive effort*

- 417 Mesquita, D.O., Costa, G.C., Colli, G.R., Costa, T.B., Shepard, D.B., Vitt, L.J., *et al.* (2016). Life-  
418 history patterns of lizards of the world. *The American Naturalist*, 187, 689–705.
- 419 Miles, D.B., Losos, J.B. & Irschick, D. (2007). Morphology, performance, and foraging mode. In:  
420 *Lizard Ecology* (eds. Reilly, S., McBrayer, L. & Miles, D.B.). Cambridge University Press,  
421 New York, pp. 49–93.
- 422 Nagy, K.A., Huey, R.B. & Bennett, A.F. (1984). Field Energetics and Foraging Mode of Kalahari  
423 Lacertid Lizards. *Ecology*, 65, 588–596.
- 424 Orme, D., Freckleton, R., Thomas, G., Petzoldt, T., Fritz, S., Isaac, N., *et al.* (2018). caper:  
425 Comparative Analyses of Phylogenetics and Evolution in R.
- 426 Packard, G.C. & Boardman, T.J. (1988). The Misuse of Ratios, Indices, and Percentages in  
427 Ecophysiological Research. *Source: Physiological Zoology*, 61, 1–9.
- 428 Parker, G.A. & Begon, M. (1986). Optimal Egg Size and Clutch Size : Effects of Environment and  
429 Maternal Phenotype. *The American naturalist*, 128, 573–592.
- 430 Perry, G. (1999). The evolution of search modes: Ecological versus phylogenetic perspectives.  
431 *American Naturalist*, 153, 98–109.
- 432 Pianka, E.R. (1966). Convexity , Desert Lizards , and Spatial Heterogeneity. *Ecology*, 47, 1055–  
433 1059.
- 434 Pianka, E.R. & Vitt, L.J. (2003). *Lizards: windows to the evolution of diversity*. University of  
435 California Press; First edition (May 15, 2006).
- 436 Pinheiro, J., Bates, D., DebRoy, S., Sarkar, D. & R Core Team. (2021). nlme: Linear and  
437 Nonlinear Mixed Effects Models.
- 438 Primack, R.B. (1979). Reproductive Effort in Annual and Perennial Species of Plantago  
439 (Plantaginaceae). *The American Naturalist*, 114, 51–62.
- 440 R Core Team. (2021). R: A Language and Environment for Statistical Computing.
- 441 Revell, L.J. (2012). phytools: An R package for phylogenetic comparative biology (and other  
442 things). *Methods in Ecology and Evolution*, 3, 217–223.
- 443 Reznick, D.N., Buckwalter, G., Groff, J. & Elder, D. (2001). The evolution of senescence in  
444 natural populations of guppies (*Poecilia reticulata*): a comparative approach. *Experimental*  
445 *Gerontology*, 36, 791–812.
- 446 Reznick, D.N. & Endler, J.A. (1982). The impact of predation on life history evolution in  
447 Trinidadian guppies: genetic basis of observed life history patterns. *Evolution*, 36, 1236–  
448 1250.
- 449 Richardson, J.L., Urban, M.C., Bolnick, D.I. & Skelly, D.K. (2014). Microgeographic adaptation  
450 and the spatial scale of evolution. *Trends in Ecology and Evolution*, 29, 165–176.
- 451 Roff, D. (2002). *Life History Evolution*. Sinauer Associates is an imprint of Oxford University  
452 Press.
- 453 Schoener, T.W. (1971). Theory of Feeding Strategies. *Annual Review of Ecology and*  
454 *Systematics*, 2, 369–404.



*Running title: Evolution of reproductive effort*

- 455 Shine, R. (1980). "Costs" of Reproduction in Reptiles. *Oecologia*, 92–100.
- 456 Silva, K.M.P., Braz, H.B., Kasperoviczus, K.N., Marques, O.A. v & Almeida-Santos, S.M. (2020).  
457 Reproduction in the pitviper *Bothrops jararacussu*: large females increase their reproductive  
458 output while small males increase their potential to mate. *Zoology*, 142, 125816.
- 459 Stearns, S.C. (2000). Life history evolution: Successes, limitations, and prospects.  
460 *Naturwissenschaften*, 87, 476–486.
- 461 Stuginski, D.R., Navas, C.A., de Barros, F.C., Camacho, A., Bicudo, J.E.P.W., Grego, K.F., *et al.*  
462 (2018). Phylogenetic analysis of standard metabolic rate of snakes: a new proposal for the  
463 understanding of interspecific variation in feeding behavior. *Journal of Comparative*  
464 *Physiology B: Biochemical, Systemic, and Environmental Physiology*, 188, 315–323.
- 465 Tinkle, D.W. (1967). The Life and Demography of the Side-Blotched Lizard. *Miscellaneous*  
466 *Publications, Museum of Zoology, University of Michigan*, 182.
- 467 Vitt, L.J. & Congdont, J. (1978). Body shape, reproductive effort, and relative clutch mass in  
468 lizards: resolution of a paradox. *The American Naturalist*, 112, 595–608.
- 469 Vitt, L.J. & Price, H. (1982). Ecological and Evolutionary Determinants of Relative Clutch Mass in  
470 Lizards. *Herpetologica*, 38, 237–255.
- 471 Vitt, L.J., Pianka, E.R., Cooper, W.E.Jr. & Schwenk, K. (2003). History and the global ecology of  
472 squamate reptiles. *American Naturalist*, 162, 44–60.
- 473 Wasiolka, B., Blaum, N., Jeltsch, F. & Henschel, J. (2009). Behavioural responses of the lizard  
474 *Pedioplanis l. lineocellata* to overgrazing. *Acta Oecologica*, 35, 157–162.
- 475 Webb, J.K., Brook, B.W. & Shine, R. (2003). Does foraging mode influence life history traits? A  
476 comparative study of growth, maturation and survival of two species of sympatric snakes  
477 from south-eastern Australia. *Austral Ecology*, 28, 601–610.
- 478 Werner, E.E. & Anholt, B.R. (1993). Ecological consequences of the trade-off between growth  
479 and mortality rates mediated by foraging activity. *Am. Nat*, 142, 242–272.
- 480 Zheng, Y. & Wiens, J.J. (2016). Combining phylogenomic and supermatrix approaches, and a  
481 time-calibrated phylogeny for squamate reptiles (lizards and snakes) based on 52 genes  
482 and 4162 species. *Molecular Phylogenetics and Evolution*, 94, 537–547.
- 483

Running title: *Evolution of reproductive effort*

484 **Figures and Tables**

485

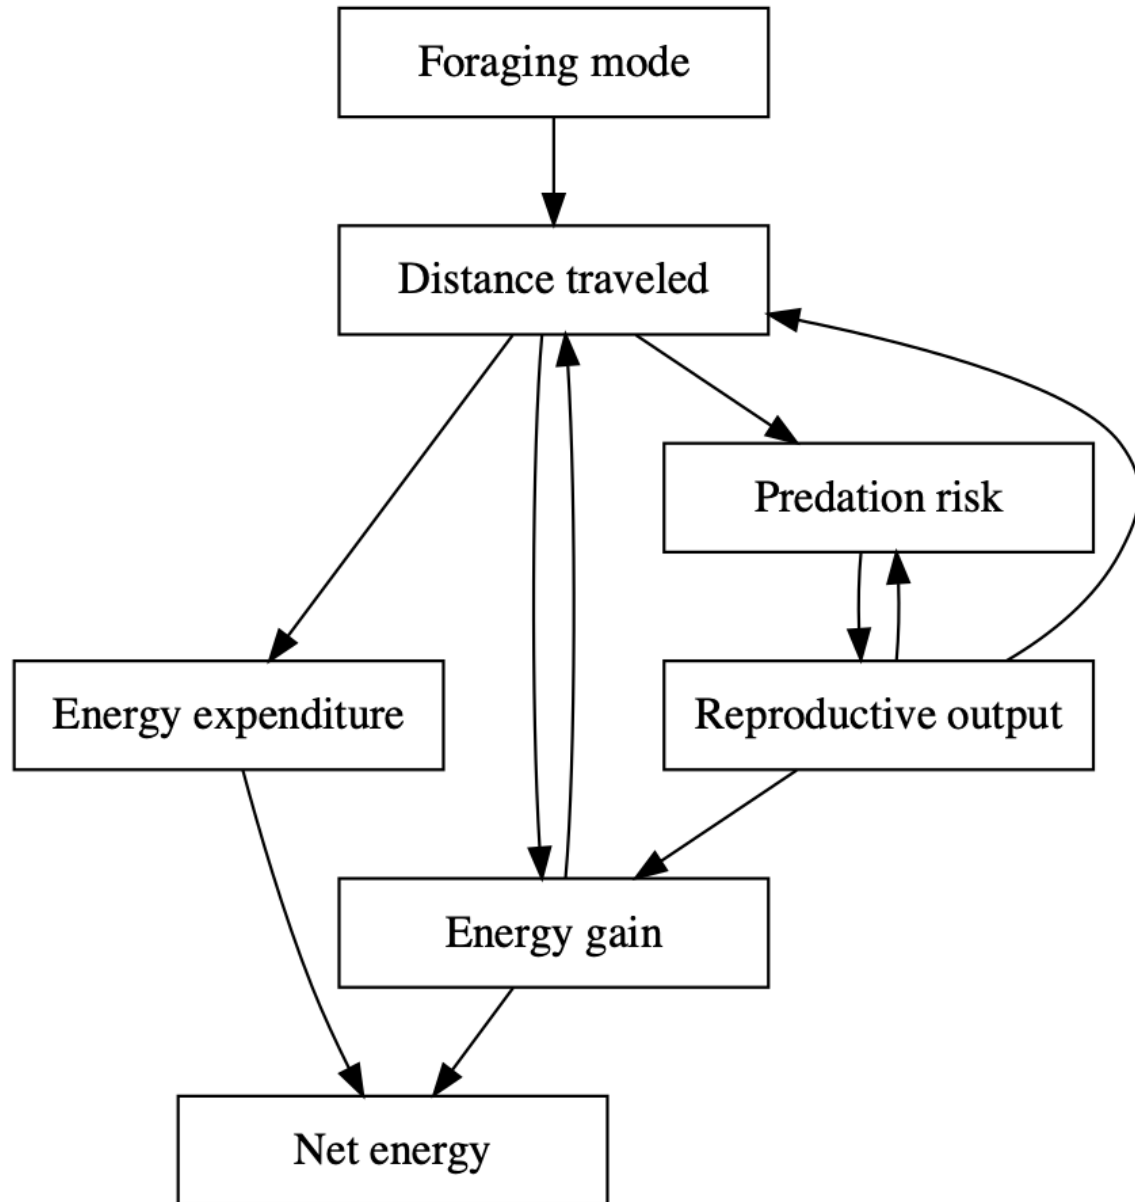

486

487 **Fig. 1.** Conceptual model depicting potential relationships between foraging behavior, energetics,  
488 predation risk, and reproductive effort. The predicted relationships derived from long-standing  
489 models of life-history theory (see text).

Running title: Evolution of reproductive effort

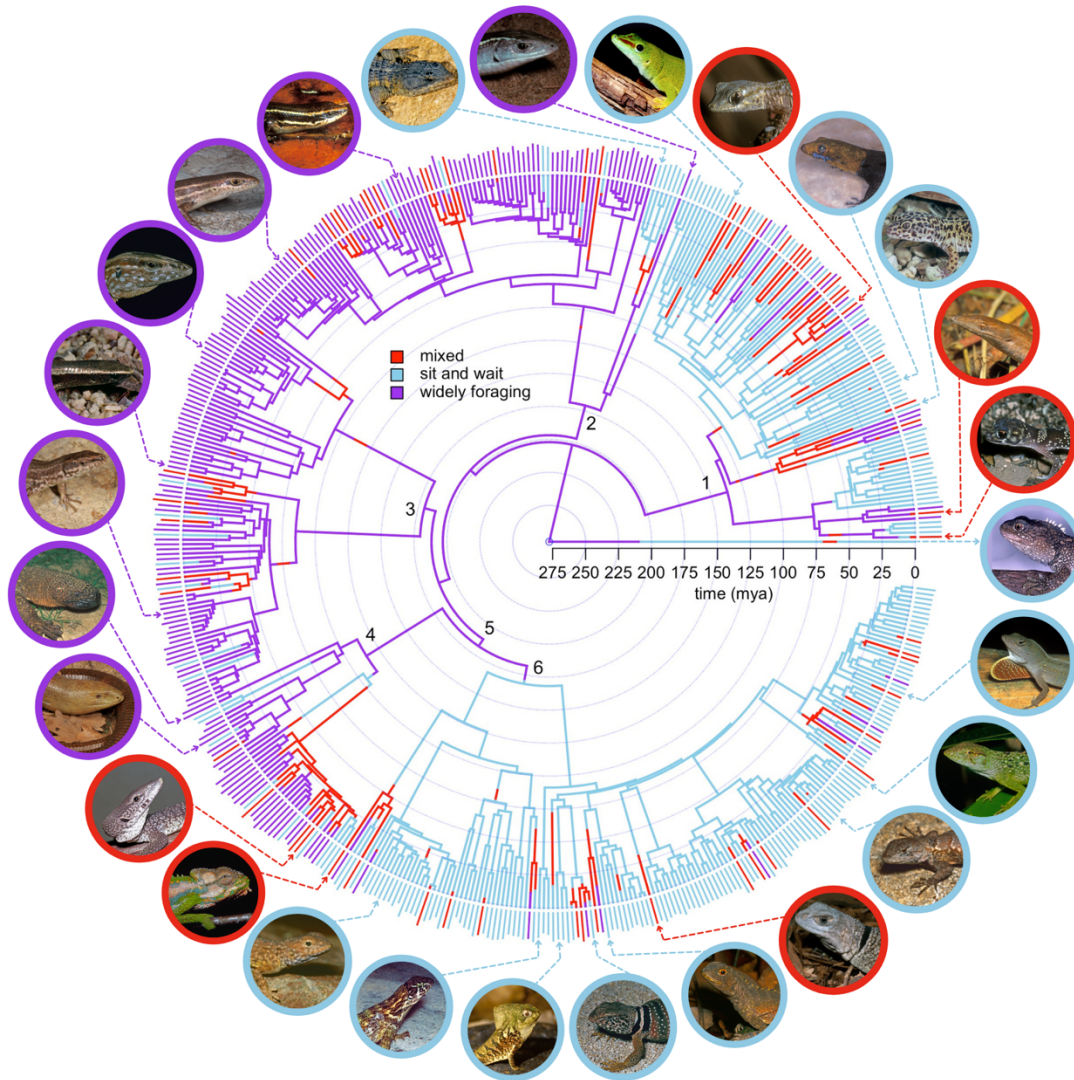

490

491 **Fig. 2.** Random sample of stochastic character maps depicting the evolution of foraging mode in  
492 485 species of lizards (see supporting material for estimates of ancestral states in each internal  
493 node). Bars at the tips of the phylogeny represent log-transformed values of reproductive effort  
494 for all lizards, but not the outgroup *Sphenodon punctatus*. Major clades are enumerated as  
495 follows: 1) Gekkota, 2) Scincoidea, 3) Lacertoidea, 4) Anguimorpha, 5) Toxicofera, and 6)  
496 Iguania. Lizard photos by Mark O'Shea.

497

498

Running title: Evolution of reproductive effort

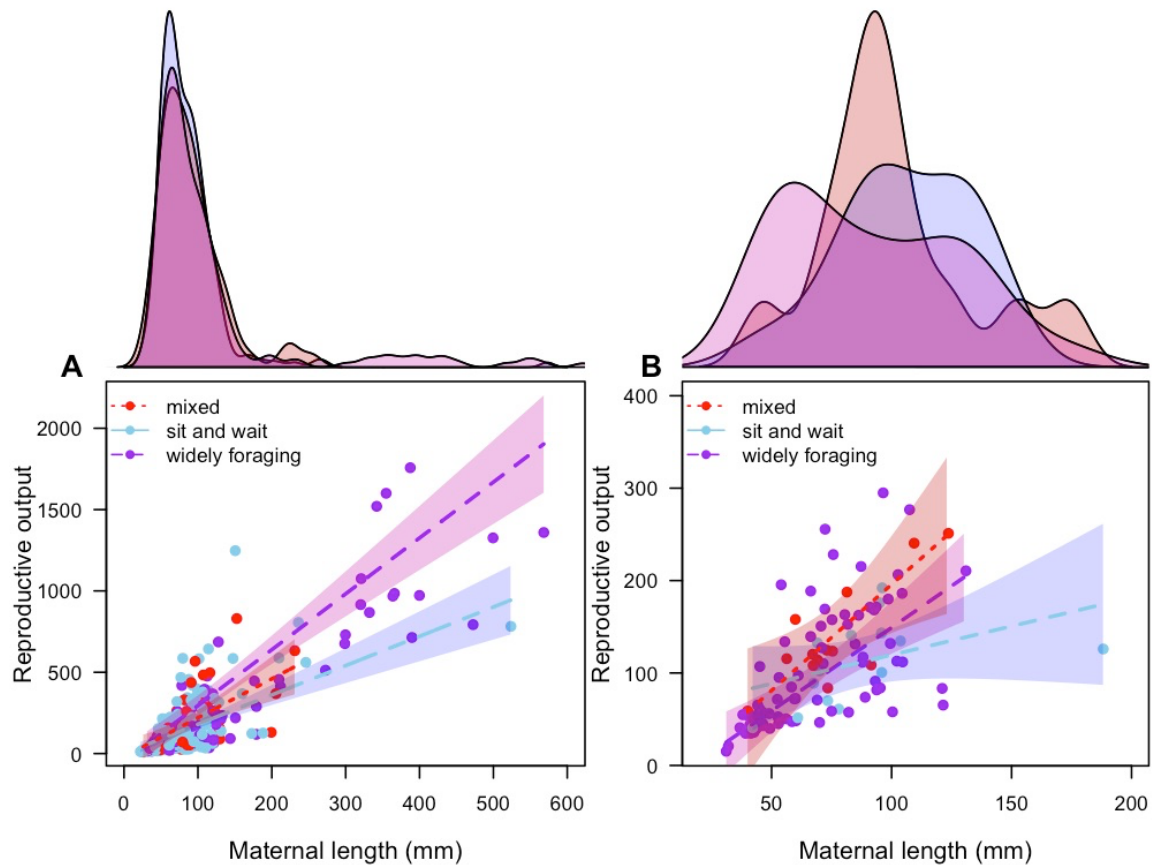

499

500 **Fig. 3.** Effects of maternal length and foraging mode on the evolution of the reproductive effort of  
501 lizards, as determined by phylogenetic generalized least squares analysis. A) In Lacertilians,  
502 widely foraging species have evolved the greatest reproductive effort. However, our analysis  
503 revealed a right-skewed distribution of body length in this clade. B) The same pattern holds in  
504 lizards with small and normal-distributed body length, such as skinks. According to the estimated  
505 parameters of the model, sit-and-wait species have the lowest reproductive effort  
506 ( $\beta = -1.026, Std. Error = 0.507, t - value = -2.021, p = 0.046$ ).

507

Running title: Evolution of reproductive effort

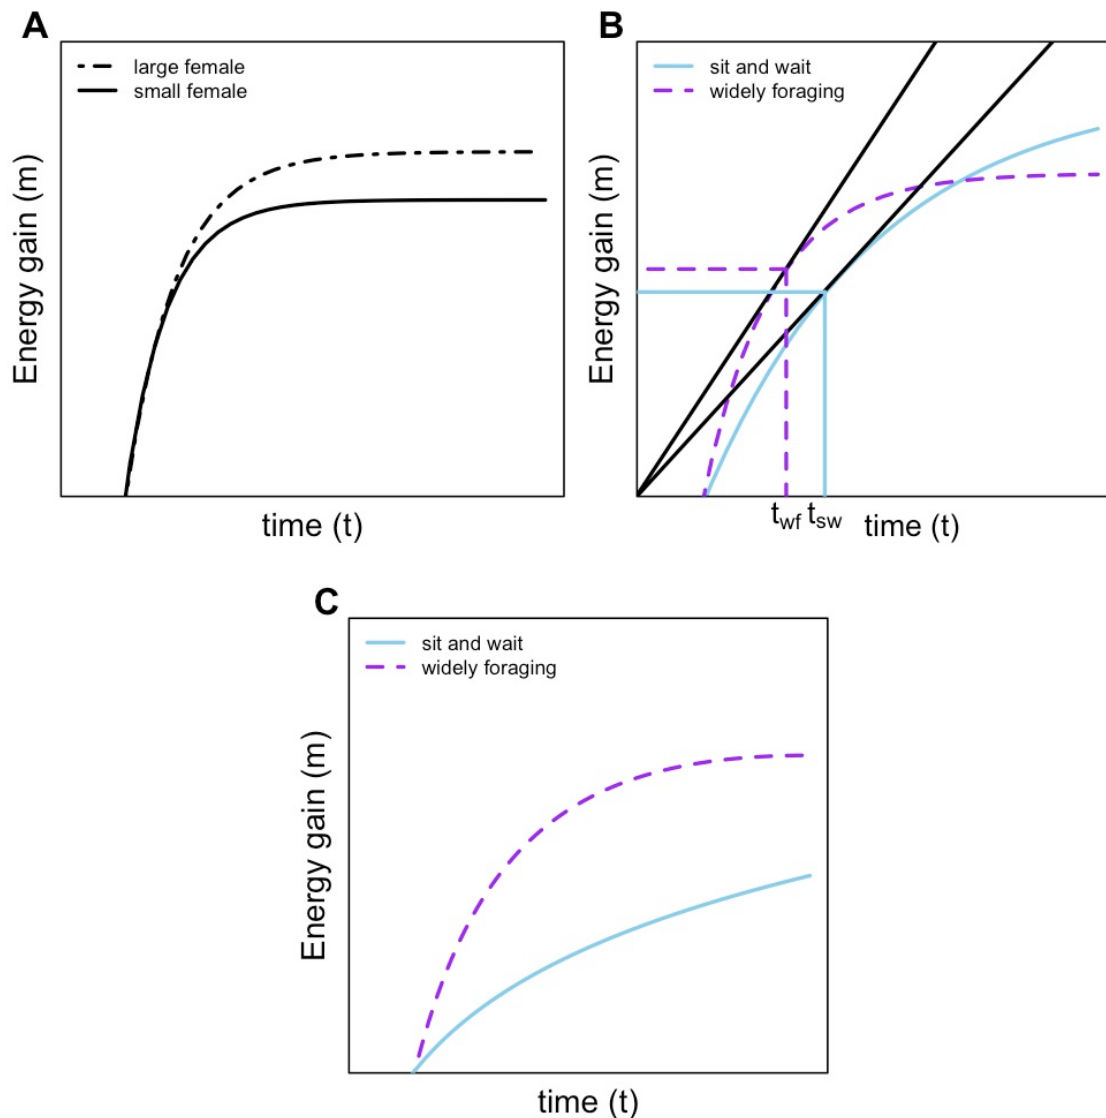

508

509 **Fig. 4.** Theoretical model relating the amount of energy gain for reproduction,  $m$ , as a function of  
510 time spent foraging,  $t$ , and maternal size. A) Larger females reach their maximum capacity at a  
511 higher value of  $m$  than small females. B) Widely foraging females that are smaller but more  
512 efficient foragers may produce a greater reproductive effort than larger sit-and-wait females. C)  
513 Widely foraging females may also produce a greater reproductive effort than sit-and-wait females  
514 if they are both larger and more efficient foragers.  $t_{wf}$  and  $t_{sw}$  in (B) represent the optimal  
515 foraging time of widely foraging females and sit-and-wait females, respectively.

516

*Running title: Evolution of reproductive effort*

517 **Table 1.** Summary statistics for the most likely model of evolution of the reproductive effort,  
518 based on the ranking of AICc for potential candidate models included in our analyses.

| <b>Terms</b>             | <b>numDF</b> | <b>F-value</b> | <b>p-value</b> |
|--------------------------|--------------|----------------|----------------|
| (Intercept)              | 1            | 27.560         | <.0001         |
| female.SVL               | 1            | 533.959        | <.0001         |
| foraging.mode            | 2            | 0.533          | 0.587          |
| female.SVL:foraging.mode | 2            | 19.910         | <.0001         |

519

520
